# Supplementary material for: Costs and outcomes of mobile cardiac outpatient telemetry monitoring post-transcatheter aortic valve replacement
Source: Atypon-hosted journal article supplement (doi:10.2217/cer-2022-0112), 2022-07-28
Supplement: supplementary materials (7).docx [file supplementary%20materials%20(7).docx]

**Supplementary Table 1 – CPT and ICD-10 Codes**

| **Procedure or Diagnosis** | **Code** |
| --- | --- |
| **TAVR CPT Codes** | 33361; 33362; 33363; 33364; 33365; 33366 |
| **TAVR ICD-10-PCS Codes** | X2RF332; 02RF37Z; 02RF37H; 02RF3KZ; 02RF3KH; 02RF3JH; 02RF3JZ; 02RF4JZ; 02RF4KZ; 02RF38Z; 02RF38H; 02RF47Z; 02RF48Z |
| **MCOT CPT Codes** | 93229; 93228 |
| **Pacemaker CPT Codes** | 33206; 33207; 33208; 93288; 93281; 93294 |
| **Pacemaker ICD-10-PCS Codes** | 0JH60PZ; 0JH63PZ; 0JH80PZ; 0JH83PZ; 0JH604Z; 0JH605Z; 0JH606Z; 0JH634Z; 0JH635Z; 0JH636Z; 0JH804Z; 0JH834Z; 0JH805Z; 0JH835Z; 0JH806Z; 0JH836Z; 02HK4JZ; 02HK3JZ; 02HK0JZ |
| **Defibrillator CPT Codes** | 33249; 93289; 93283; 93284 |
| **Defibrillator ICD-10-PCS Codes** | 0JH608Z; 0JH638Z; 0JH808Z; 0JH838Z |
| **Pacemaker and Defibrillator ICD-10-CM Codes** | Z950; Z95810; Z95818 |
| **Block ICD-10-CM Codes** | I440; I441; I442; I4430; I4439; I444; I445; I4460; I4469; I447; I450; I4510; I4519; I452; I453; I454; I455; I4589; I459 |

**Abbreviations:** TAVR, transcatheter aortic valve replacement; CPT, Current Procedural Terminology**,** ICD, international classification of diseases; PCS, procedure coding system; CM, clinical modification; MCOT, mobile cardiac outpatient telemetry

**Supplementary Table 2: Propensity score adjusted revenue center costs for patients with MCOT monitoring versus non-MCOT monitoring post-TAVR procedure**

|  | **MCOT** | **Non-MCOT** | **Difference (95% CI)** | **P-Value** |  |
| --- | --- | --- | --- | --- | --- |
| *Raw n* | *275* | *3746* |  |  |  |
| *IPW n* | *2003* | *2019* |  |  |  |
| Room & Board | $3,115 | $3,357 | ($243) | 0.346 |  |
| Pharmacy & IV therapy | $830 | $837 | ($7) | 0.908 |  |
| Med/Surg Supplies | $24,557 | $27,351 | ($2,794) | **<.001** |  |
| Laboratory | $1,086 | $1,082 | $4 | 0.939 |  |
| Imaging | $398 | $457 | ($59) | 0.223 |  |
| OR & Anesthesia | $6,642 | $6,273 | $369 | 0.255 |  |
| Blood | $46 | $69 | ($23) | 0.131 |  |
| Respiratory & Pulmonary | $123 | $148 | ($25) | 0.307 |  |
| PT or OT or Speech/Auditory | $92 | $115 | ($22) | **0.040** |  |
| ER | $53 | $32 | $21 | 0.254 |  |
| Cardiology | $3,249 | $3,254 | ($4) | 0.990 |  |
| EKG/ECG and EEG | $296 | $223 | $73 | **<.001** |  |
| Other | $82 | $93 | ($11) | 0.576 |  |

**Abbreviations:** MCOT, mobile cardiac outpatient telemetry; TAVR, transcatheter aortic valve replacement; CI, Confidence interval; IV, intravenous; OR, operating room; PT, physical therapy; OT, occupational therapy; EKG/ECG, electrocardiogram; EEG, Electroencephalography

**Note:** Bolded text indicates significant P-value of <0.05
